# Supplementary material for: Cancer Vaccines Based on Fluorine-Modified KH-1 Elicit Robust Immune Response
Source: MDPI journal article supplement (doi:10.3390/molecules28041934), 2023-02-17
Supplement: s1 [file s1]

## **Supplementary Material**

### **Cancer Vaccines Based on Fluorine-modified KH-1 Elicit Robust Immune Response**

Yang Liu, Bo-Han Li, Xiu-Jing Zheng, De-Cai Xiong\* and Xin-Shan Ye\*

Correspondence: decai@bjmu.edu.cn, xinshan@bjmu.edu.cn

**Table S1.** Screening of reaction conditions for trifluoroacetylation.

| Reactant                                                                          | Additives/Solvents           | Results                                                                                         |
|-----------------------------------------------------------------------------------|------------------------------|-------------------------------------------------------------------------------------------------|
| $\text{F}_3\text{CCOOCOCF}_3$                                                     | DCM                          | The raw material remain, and the main product is multi-position substitution product            |
|                                                                                   | DMAP/Py                      | The product system is complex and cannot be analyzed                                            |
|                                                                                   | Py                           | The product system is complex and cannot be analyzed                                            |
|                                                                                   | MeOH                         | No reaction                                                                                     |
|                                                                                   | $(\text{CH}_3)_2\text{CHOH}$ | No reaction                                                                                     |
|                                                                                   | $(\text{CH}_3)_3\text{COH}$  | No reaction                                                                                     |
|                                                                                   | DMAP/MeOH                    | No reaction                                                                                     |
|                                                                                   | TEA/MeOH                     | No reaction                                                                                     |
| $\text{F}_3\text{CCOOCH}_3$                                                       | MeOH                         | No reaction                                                                                     |
|                                                                                   | TEA/MeOH                     | No reaction                                                                                     |
|                                                                                   | DMAP/MeOH                    | The main product is the target product                                                          |
| 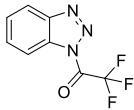 | MeOH                         | No reaction                                                                                     |
|                                                                                   | DCM                          | A large amount of raw material remain, and the main product generated is not the target product |
|  | DCM                          | New product is formed, but it deteriorates quickly                                              |

AB Sciex TOF/TOF™ Series Explorer™ 72115

TOF/TOF™ Linear Spec #1 MC=>SM15[BP = 58317.2, 445]

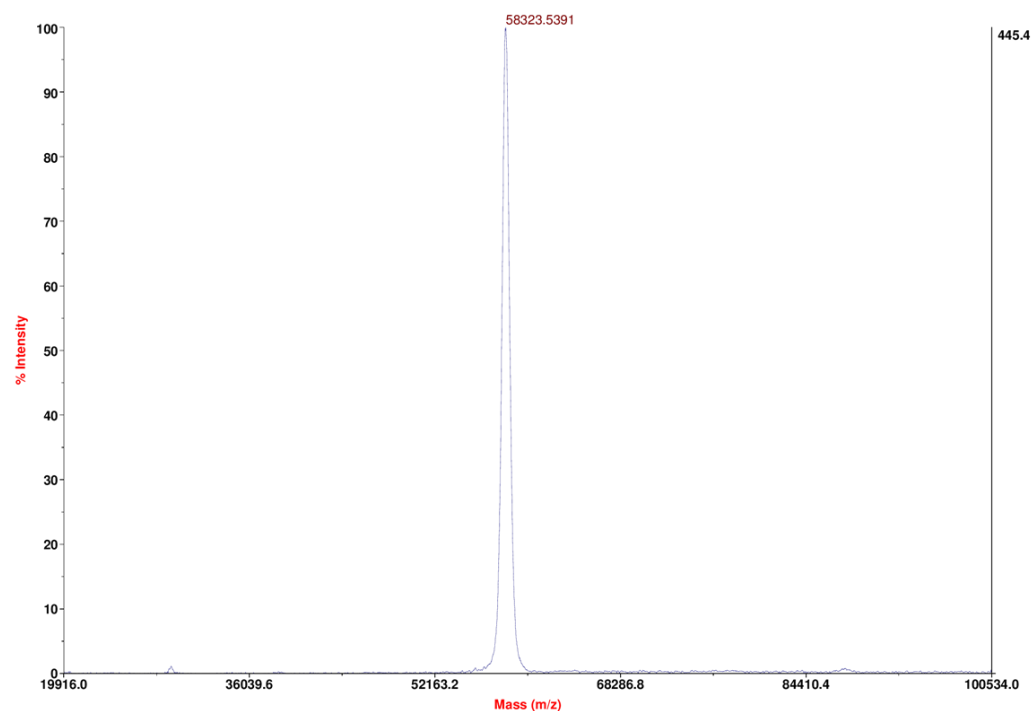

**Figure S1.** The MALDI-TOF-MS result of CRM197

AB Sciex TOF/TOF™ Series Explorer™ 72115

TOF/TOF™ Linear Spec #1 MC=>SM13[BP = 67285.0, 10]

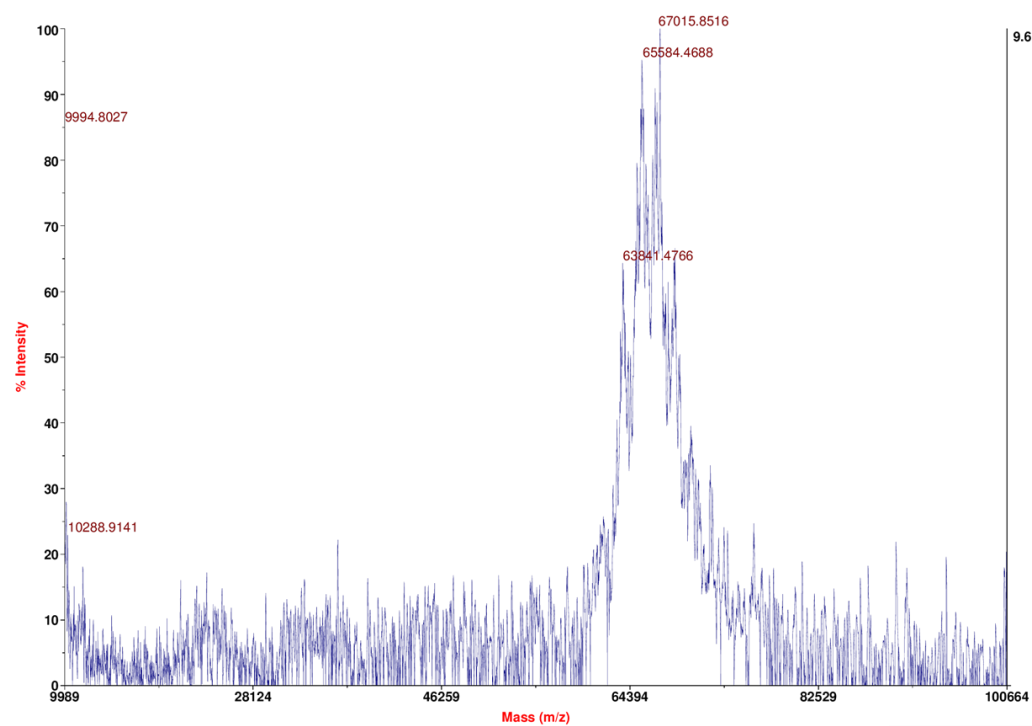

Figure S2. The MALDI-TOF-MS result of KH-1-CRM197

AB Sciex TOF/TOF™ Series Explorer™ 72115

TOF/TOF™ Linear Spec #1 MC=>SM13[BP = 70133.6, 13]

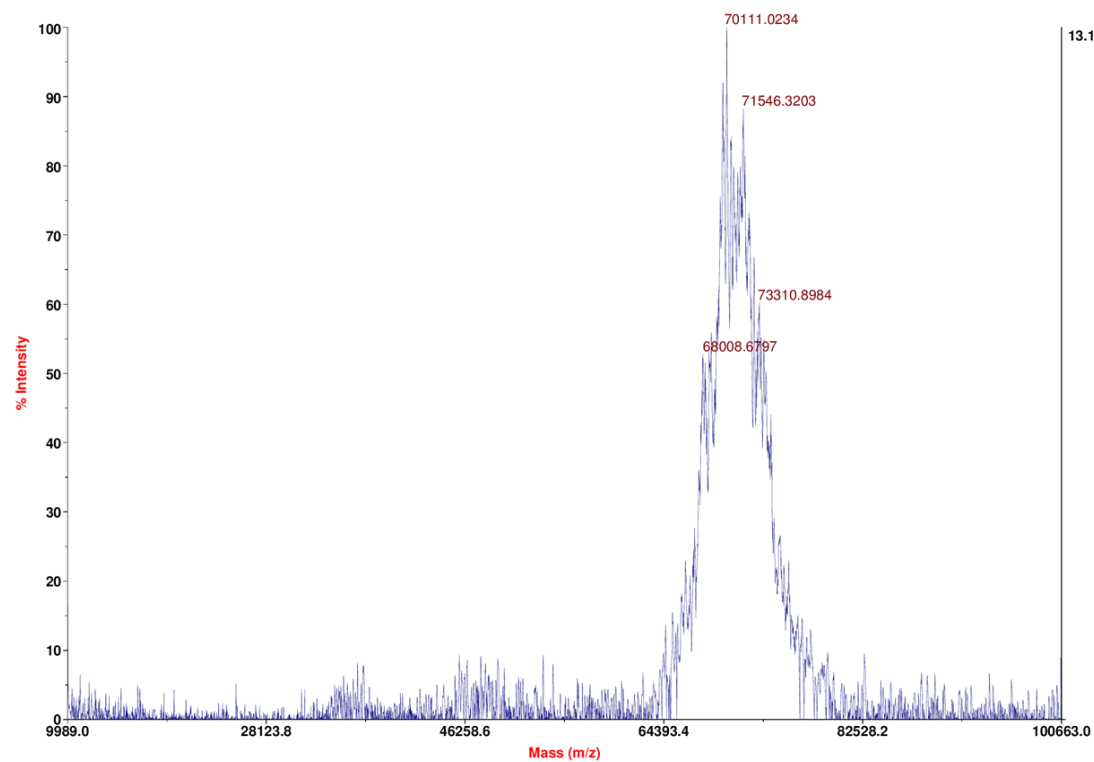

Figure S3. The MALDI-TOF-MS result of KH-1-DF-CRM197

AB Sciex TOF/TOF™ Series Explorer™ 72115

TOF/TOF™ Linear Spec #1 MC=>SM13[BP = 67908.0, 13]

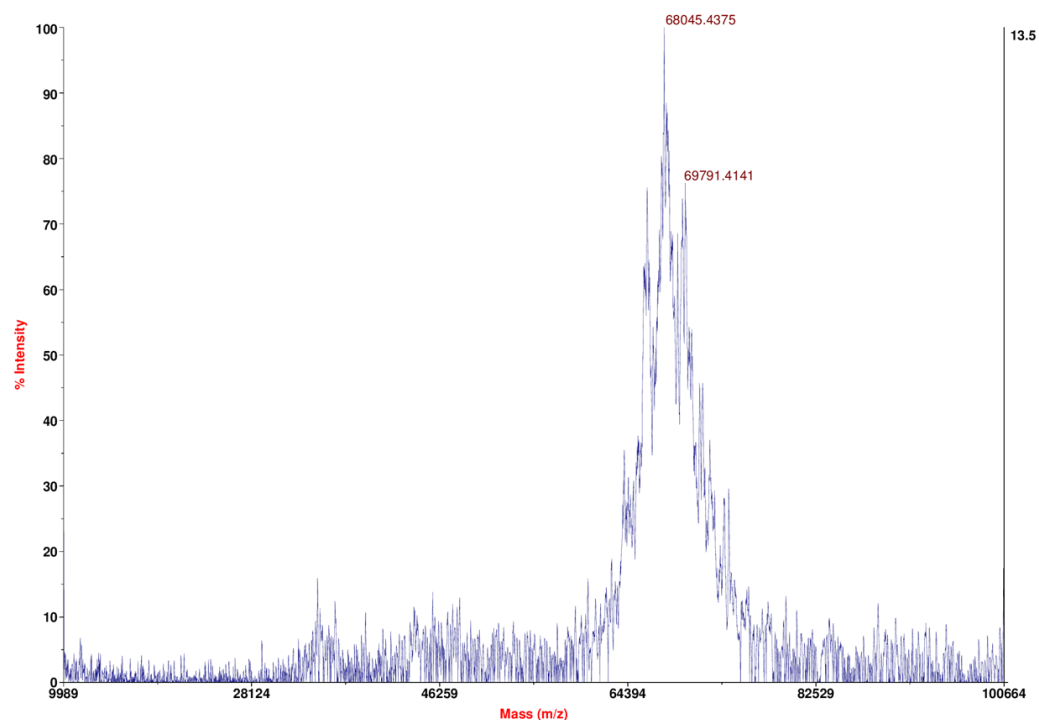

Figure S4. The MALDI-TOF-MS result of KH-1-TF-CRM197

AB Sciex TOF/TOF™ Series Explorer™ 72115

TOF/TOF™ Linear Spec #1 MC[BP = 66436.6, 1023]

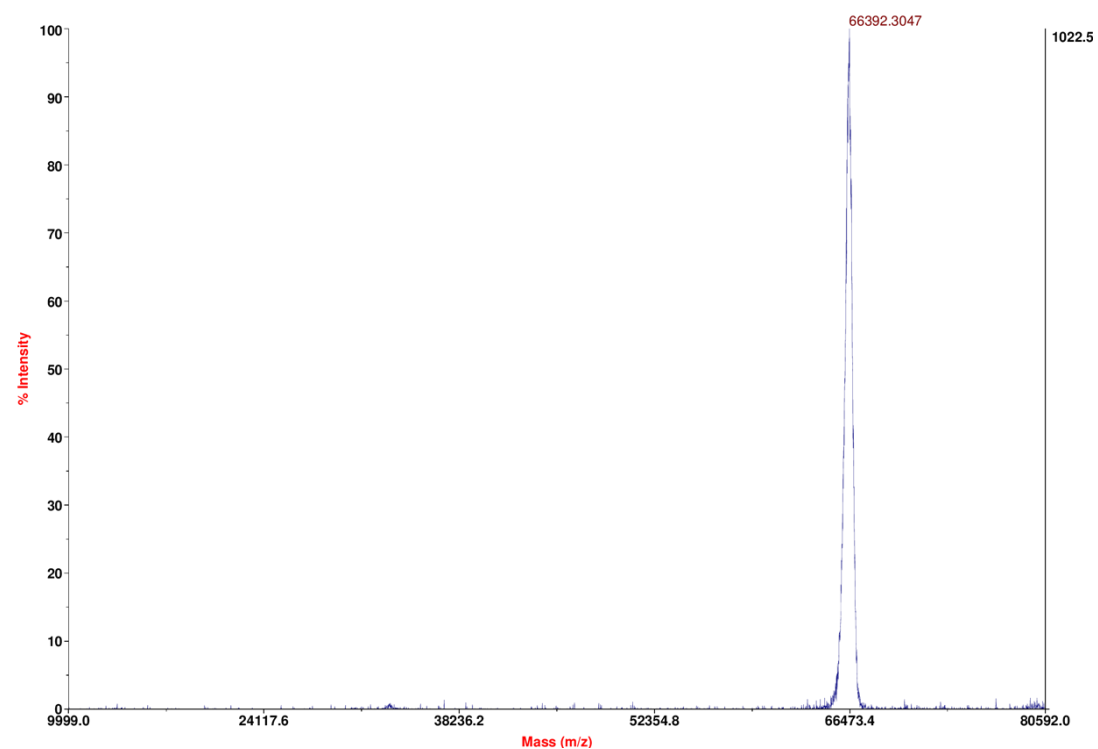

Figure S5. The MALDI-TOF-MS result of BSA

AB Sciex TOF/TOF™ Series Explorer™ 72115

TOF/TOF™ Linear Spec #1 MC=>SM21[BP = 80786.7, 39]

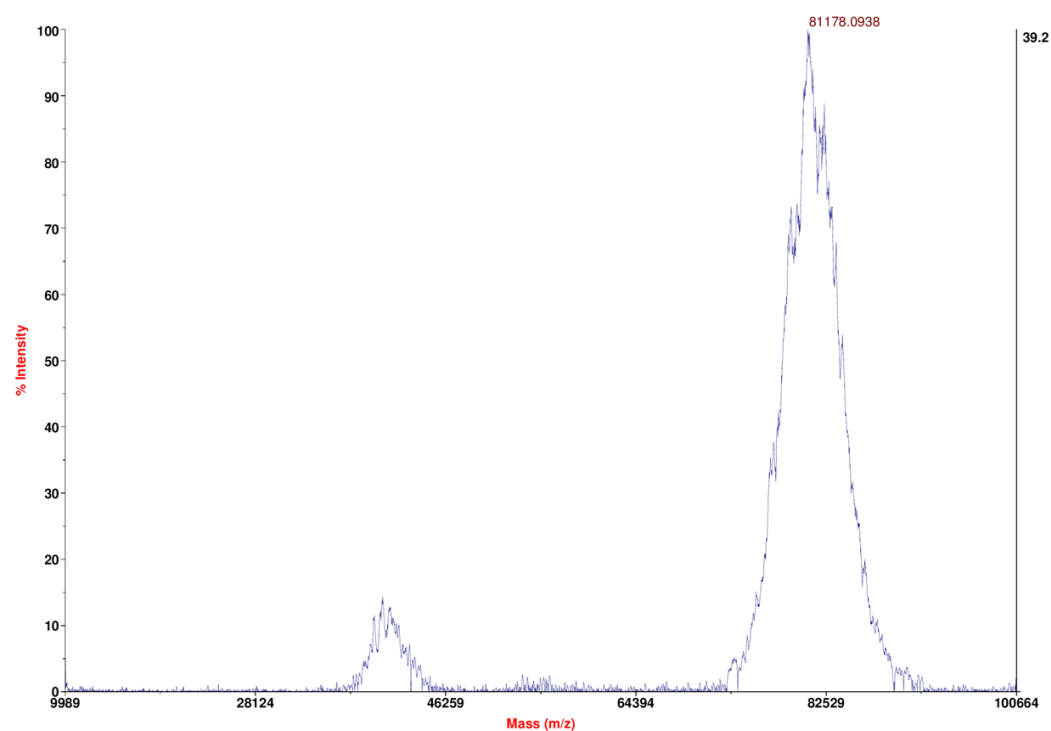

Figure S6. The MALDI-TOF-MS result of KH-1-BSA

AB Sciex TOF/TOF™ Series Explorer™ 72115

TOF/TOF™ Linear Spec #1 MC=>SM21[BP = 79742.7, 33]

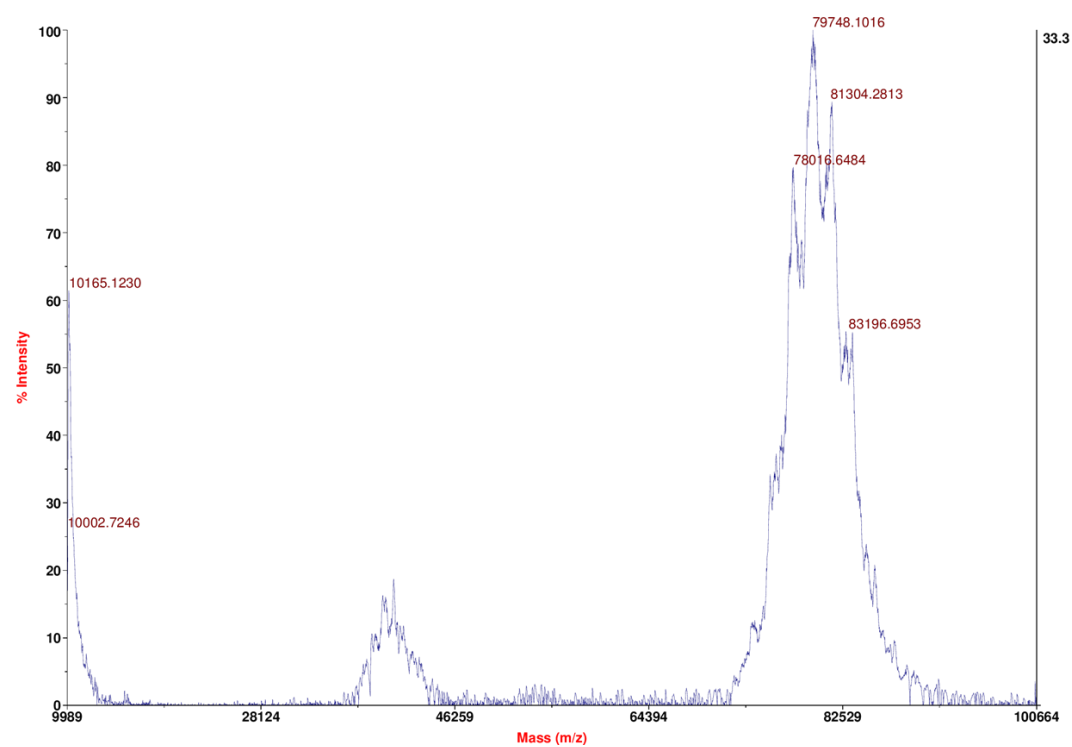

Figure S7. The MALDI-TOF-MS result of KH-1-DF-BSA

AB Sciex TOF/TOF™ Series Explorer™ 72115

TOF/TOF™ Linear Spec #1 MC=>SM21[BP = 83936.0, 53]

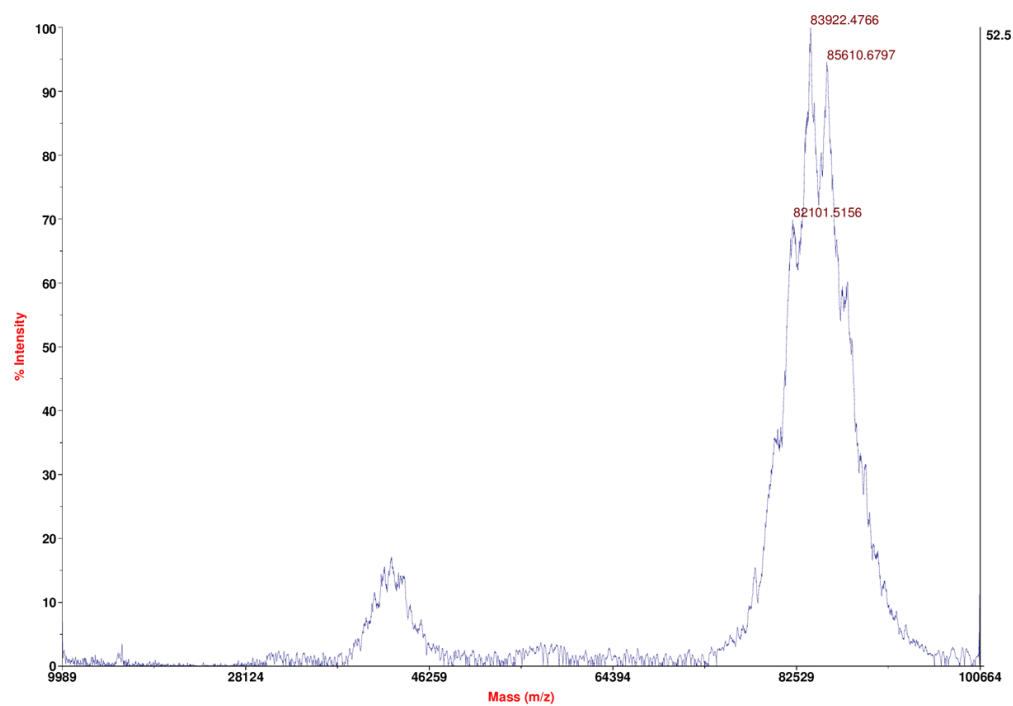

Figure S8. The MALDI-TOF-MS result of KH-1-TF-BSA

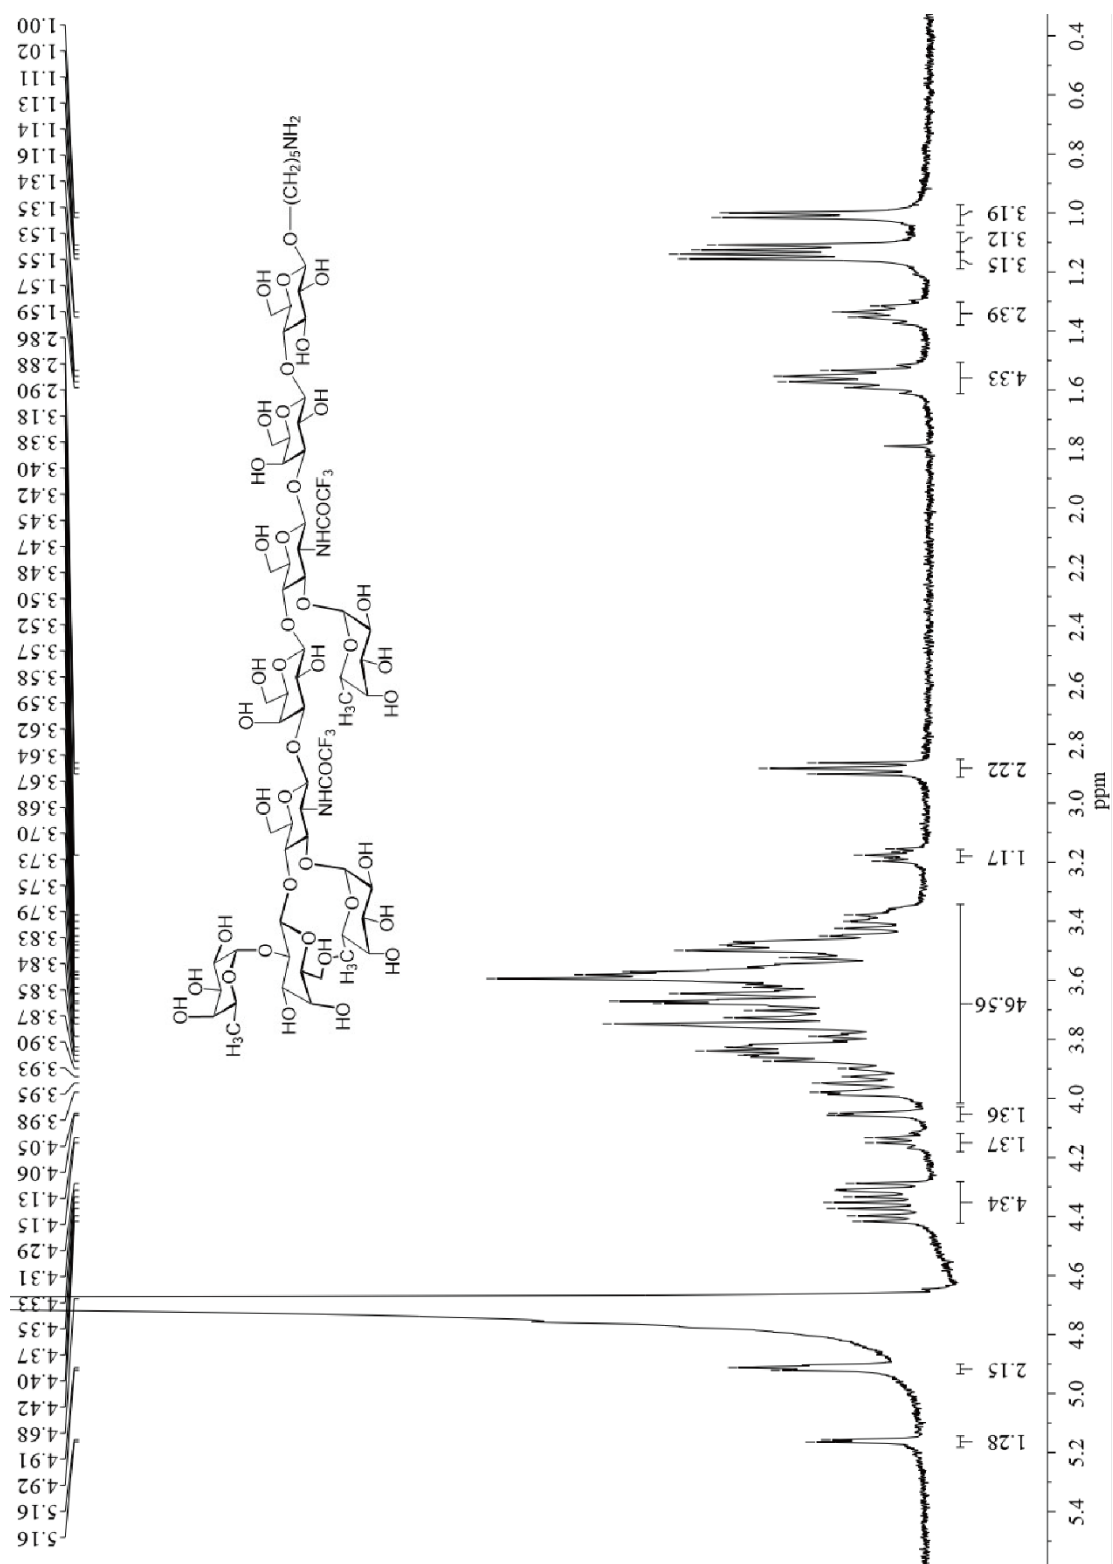

**Figure S9.** <sup>1</sup>H NMR of compound 1-2 (400 MHz, D<sub>2</sub>O)

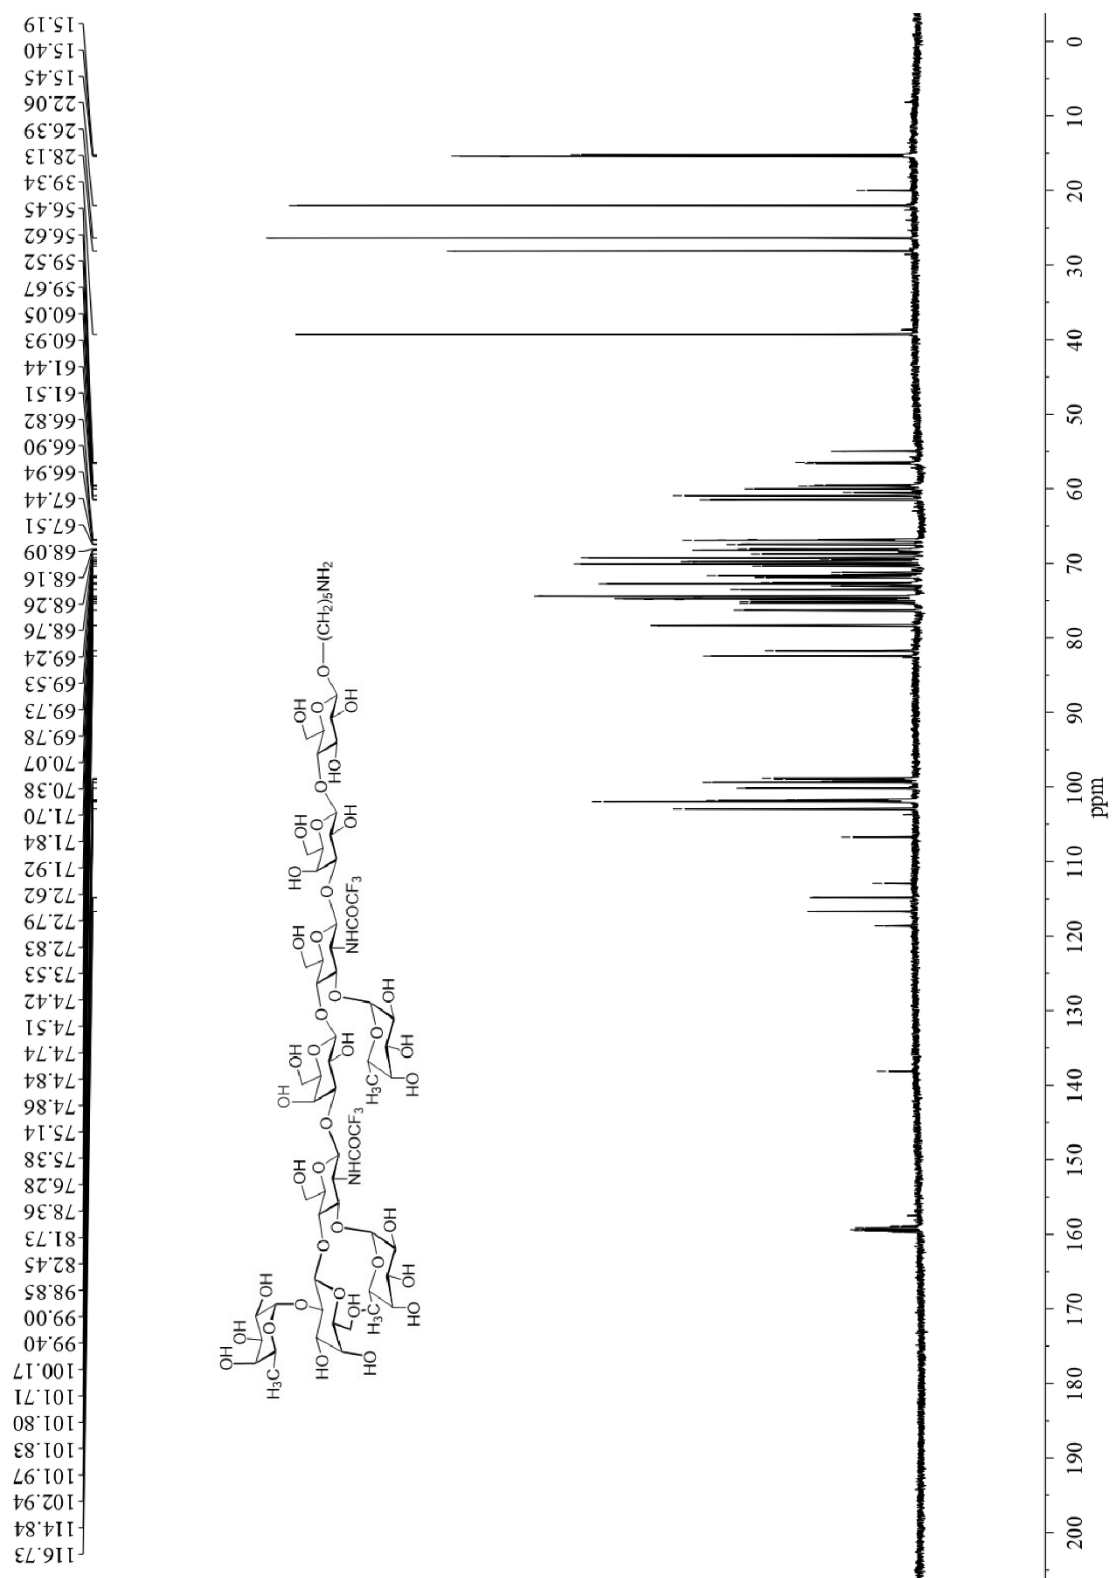

**Figure S10.**  $^{13}\text{C}$  NMR of compound 1-2 (151 MHz,  $\text{D}_2\text{O}$ )





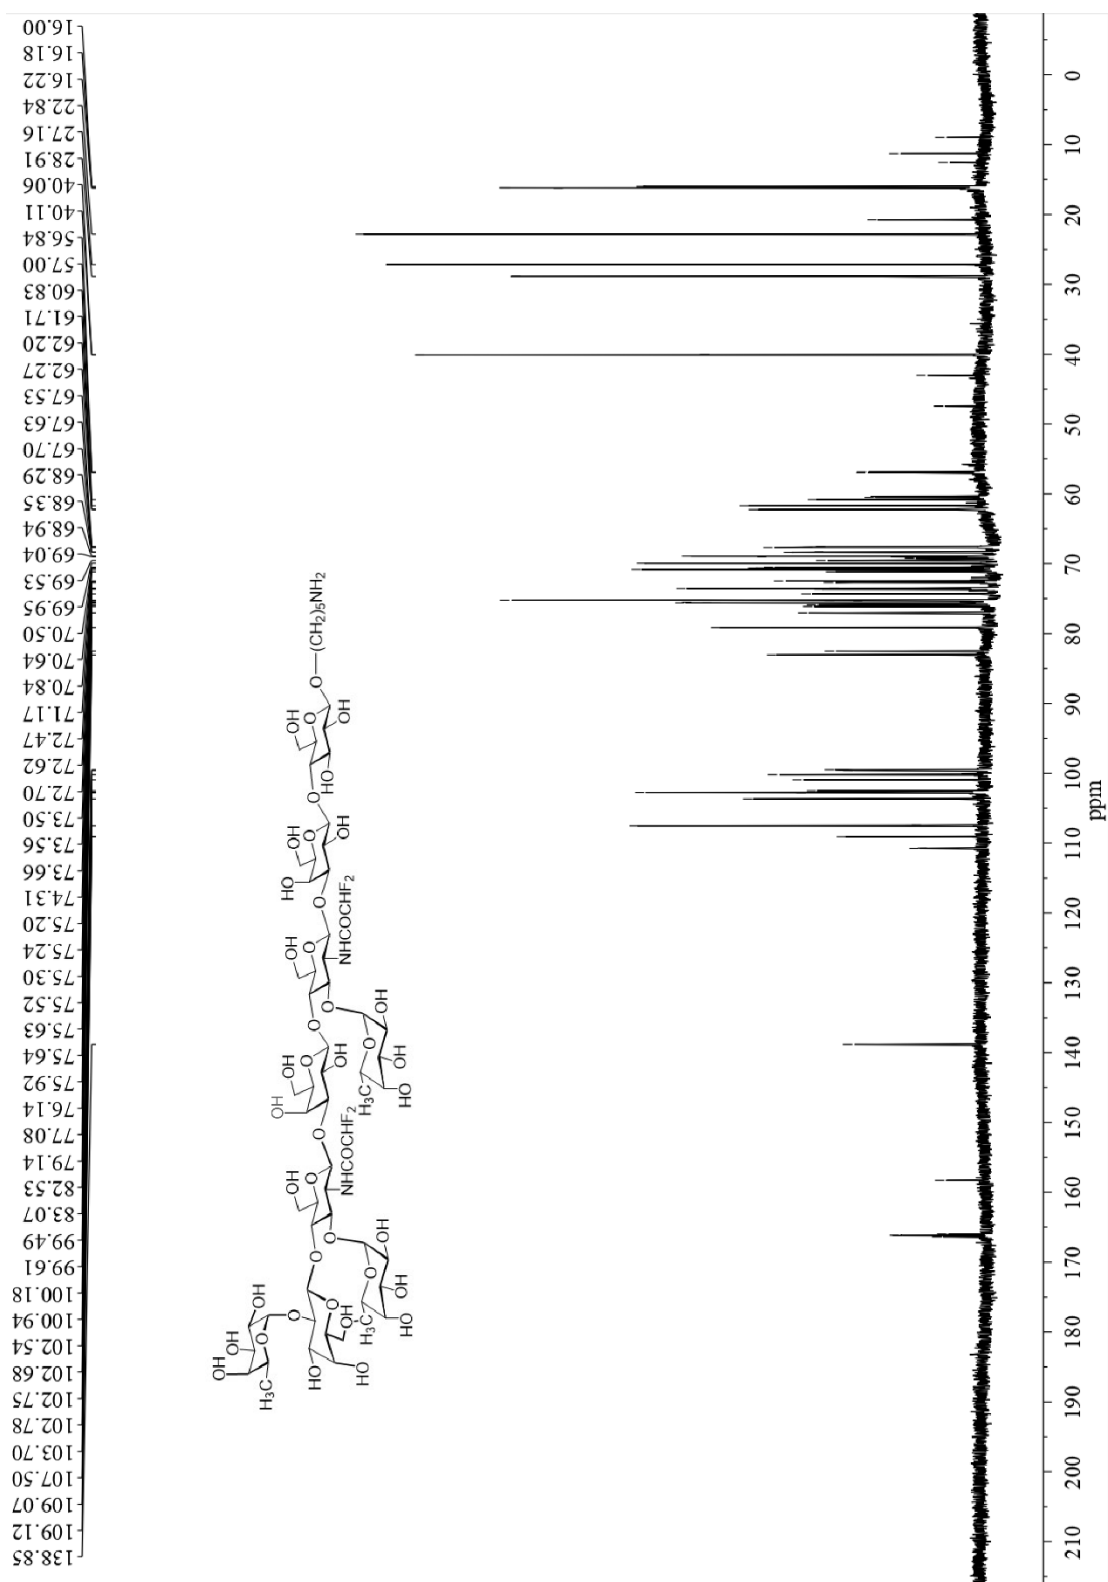

**Figure S12.**  $^{13}\text{C}$  NMR of compound 1-3 (151 MHz,  $\text{D}_2\text{O}$ )
